# Supplementary material for: Optimizing DNA Extraction Methods for Nanopore Sequencing of Neisseria gonorrhoeae Directly from Urine Samples
Source: PubMed Central journal article supplement (PMC7041563; doi:10.1128/jcm.01822-19), 2020-02-24
Supplement: JCM.01822-19-s0001.pdf [file JCM.01822-19-s0001.pdf]

# Optimizing DNA extraction methods for Nanopore sequencing of *Neisseria gonorrhoeae* direct from urine samples: Supplemental material

## Supplementary Table

**Table S1. Summary of hands on time and total time for each of the four human DNA depletion methods, DNA extraction methods and ONT sequencing preparation, and their approximate cost per sample.** Total time includes all incubation steps longer than 15 minutes. Following the times shown ONT sequencing was run for up to 48 hours. Initial results were typically available faster (Figure 2). Costs are based on actual reagent prices paid during the study.

| Method                                          | Hands on time (single sample) | Hands on time (per batch) | Total time (per batch) | Cost per sample (US \$) |
|-------------------------------------------------|-------------------------------|---------------------------|------------------------|-------------------------|
| <b>Human DNA depletion</b>                      |                               |                           |                        |                         |
| MolYsis Basic5                                  | 45 min                        | 1hr 40 min                | 1hr 40 min             | 10.40                   |
| Saponin + nuclease                              | 1hr 10min                     | 2 hr                      | 2 hr                   | 4.55                    |
| Differential centrifugation                     | 30 min                        | 1 hr 10 min               | 1 hr 10 min            | 0.13                    |
| No treatment                                    | 25 min                        | 35 min                    | 35 min                 | 0.13                    |
| <b>DNA extraction</b>                           |                               |                           |                        |                         |
| MagMAX Total Nucleic Acid Isolation Kit         | 1hr 15 min                    | 3hs 25 min                | 3hr 25 min             | 3.51                    |
| Mechanical lysis + ethanol Precipitation        | 1hr 40 min                    | 2hr 40 min                | 4hr                    | 4.55                    |
| QIAamp UCP Pathogen Mini Kit                    | 1hr 30 min                    | 2hr 50 min                | 2hr 50 min             | 8.06                    |
| i-genomic Urine DNA Extraction Mini kit         | 45 min                        | 1hr 50 min                | 1hr 50 min             | 5.20                    |
| <b>Sequencing preparation and flowcell cost</b> |                               |                           |                        |                         |
| ONT Rapid PCR barcoding kit + flowcell          | 1hr 10 min                    | 1hr 40 min                | 5hr 25 min             | 409.50                  |
| <b>Saponin + QIAamp laboratory method</b>       | 3hr 50 min                    | 6hr 30min                 | 10hr 15 min            | 422.11                  |

**Table S2. Quality metrics for clinical sample sequences.** Please see the separate excel spreadsheet provided. The number of human bases and reads were determined from porechop demultiplexed data (see methods), all other metrics were determined from guppy demultiplexed data.

**Table S3. Potential predictors of successful sequencing for 10 urine samples.** Table uses pooled reads from samples processed with and without saponin. Following transport overnight to the laboratory at ambient temperature, samples were stored at 4°C between collection and DNA extraction.

| Sample | NAAT CT value, opa | NAAT CT value, pilin | Days between sample collection and DNA extraction | DNA loaded on to flowcell, fmol | Nanopore initial QC pores | Percentage of reference genome with $\geq 1x$ depth coverage | Percentage of reference genome with $\geq 10x$ depth coverage |
|--------|--------------------|----------------------|---------------------------------------------------|---------------------------------|---------------------------|--------------------------------------------------------------|---------------------------------------------------------------|
| 202    | 20.3               | 22.1                 | 44                                                | 50                              | 1170                      | 97.2%                                                        | 80.9%                                                         |
| 206    | 22.7               | 22.6                 | 45                                                | 50                              | 1250                      | 98.4%                                                        | 93.8%                                                         |
| 250    | 21.0               | 22.0                 | 24                                                | 50                              | 1337                      | 99.0%                                                        | 98.8%                                                         |
| 271    | 28.8               | 28.7                 | 6                                                 | 60                              | 1474                      | 99.4%                                                        | 99.1%                                                         |
| 294    | 20.5               | 20.5                 | 6                                                 | 60                              | 1613                      | 99.2%                                                        | 97.8%                                                         |
| 301    | 22.3               | 22.6                 | 27                                                | 50                              | 1170                      | 99.1%                                                        | 98.8%                                                         |
| 303    | 25.9               | 25.6                 | 19                                                | 50                              | 1402                      | 98.7%                                                        | 43.4%                                                         |
| 304    | 21.5               | 23.1                 | 39                                                | 41                              | 1171                      | 92.8%                                                        | 52.4%                                                         |
| 314    | 20.2               | 21.6                 | 32                                                | 50                              | 1587                      | 99.0%                                                        | 98.7%                                                         |
| 315    | 18.8               | 20.1                 | 25                                                | 50                              | 1445                      | 99.2%                                                        | 98.7%                                                         |

## Supplementary Figures

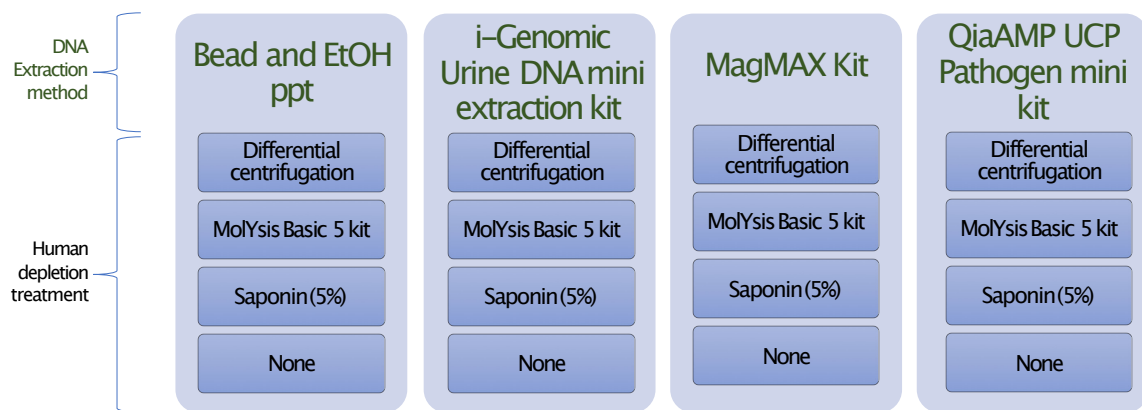

**Figure S1. *N. gonorrhoeae* spiking experiments.** *N. gonorrhoeae* NAAT-negative urine was pooled and spiked with approximately  $10^3$ ,  $10^5$  or  $10^7$  CFU/ml of reference strains WHO F, WHO V or WHO X. Each human DNA depletion method was tested in triplicate, at each spiked amount, with each DNA extraction method. A single, no-spike control was included per depletion method (160 extractions in total).

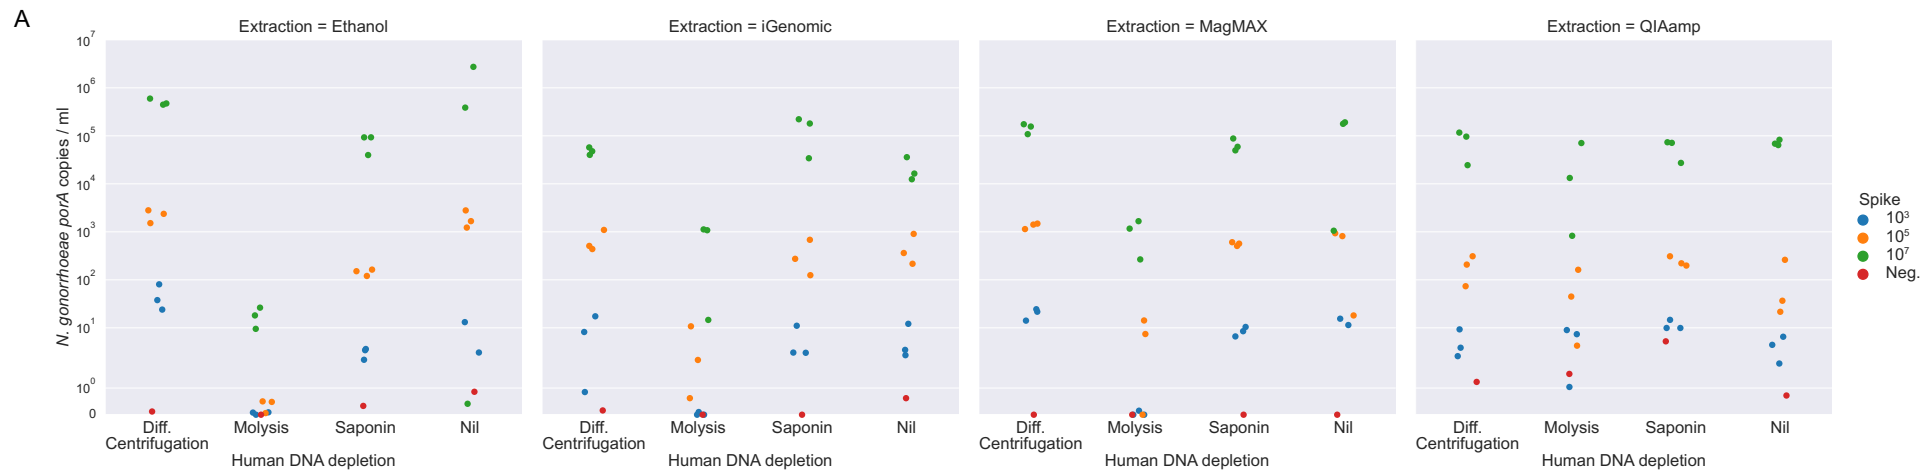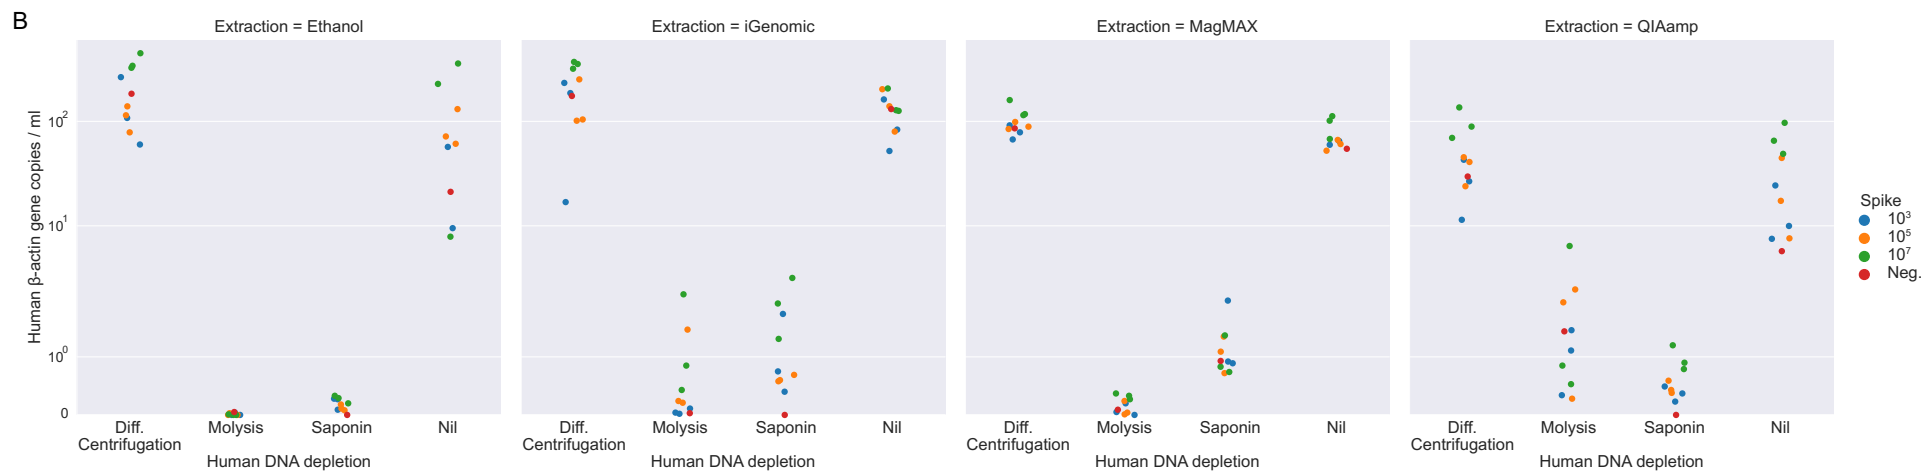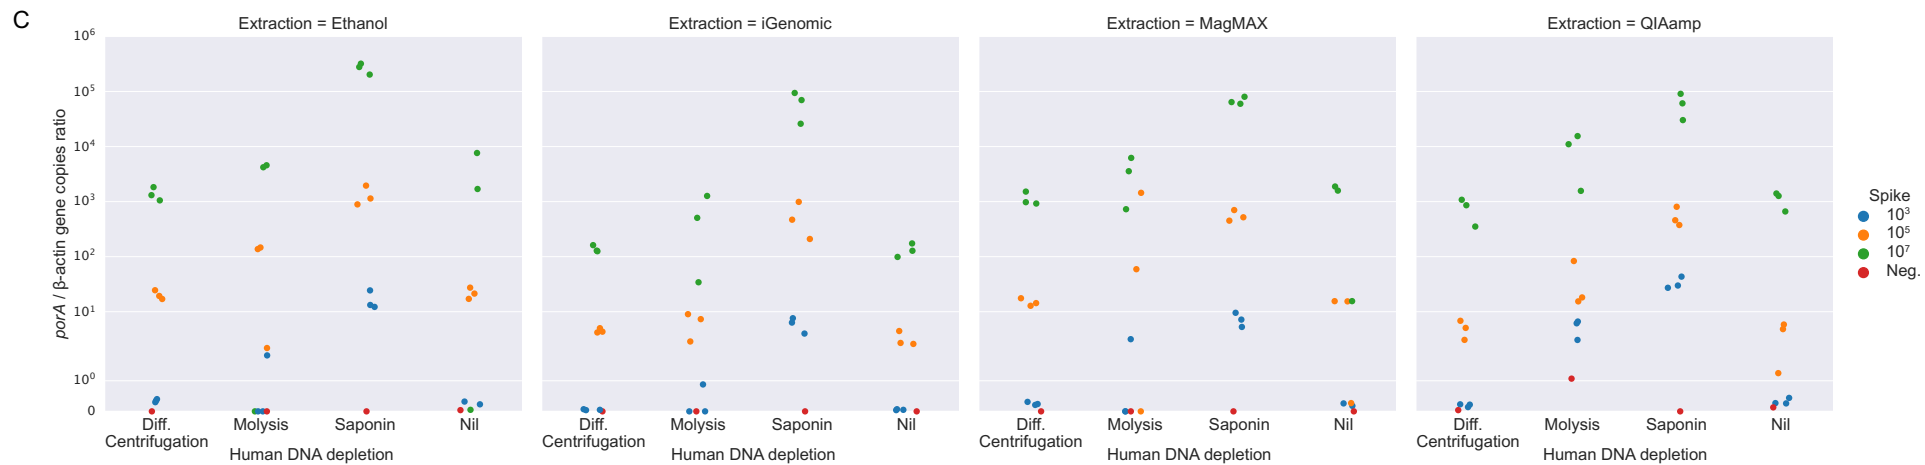

**Figure S2. Performance of human DNA depletion methods and DNA extraction methods using qPCR.** Row A shows the copies per ml of *N. gonorrhoeae porA*, row B shows the number of human  $\beta$ -actin copies per ml and row C shows the average proportion of *porA* to  $\beta$ -actin copies. Within each row, each of the 4 panels show different DNA extraction methods, and within each panel different human DNA depletion strategies are shown. Each point plotted is coloured by the target *N. gonorrhoeae* spike concentration, with each spike concentration tested in triplicate for each DNA extraction and human DNA depletion combination. Abbreviations for human depletion methods as follows: Diff. Centrifugation, differential centrifugation; MoLYsis, MoLYsis Basic5 kit; Saponin, saponin-based differential lysis; None, no human depletion. Data are not shown for the  $10^3$  CFU/ml WHO F spikes with no human DNA depletion, extracted with both ethanol precipitation and the MagMAX kit, due to a technical failure in the laboratory. Up to 8 copies of *porA* were seen in the negative samples extracted using the QIAamp kit, this probable low-level contamination is unlikely to have significantly impacted the spiked results for this kit.

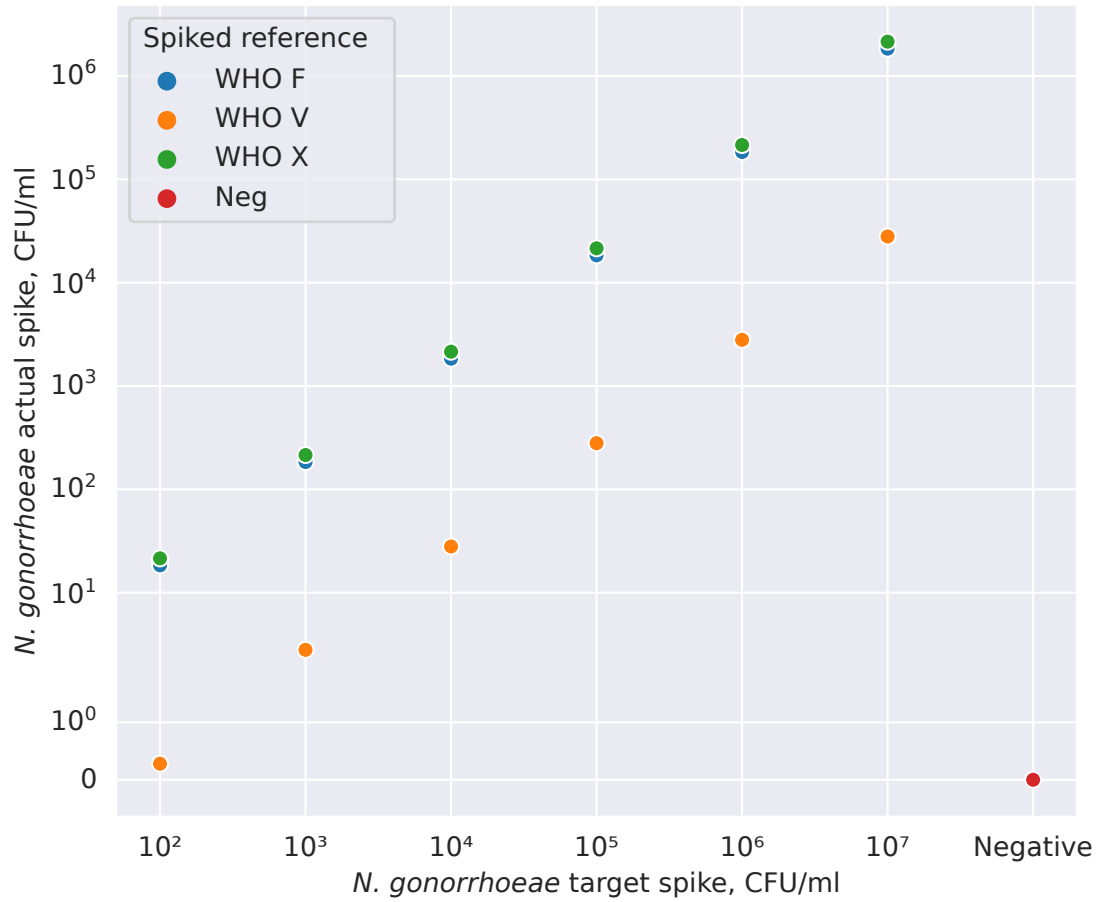

**Figure S3. Target versus actual *N. gonorrhoeae* spiking concentrations.** CFU/ml concentrations of the *N. gonorrhoeae* reference strains used in the limit of detection, in-depth spiking experiments.

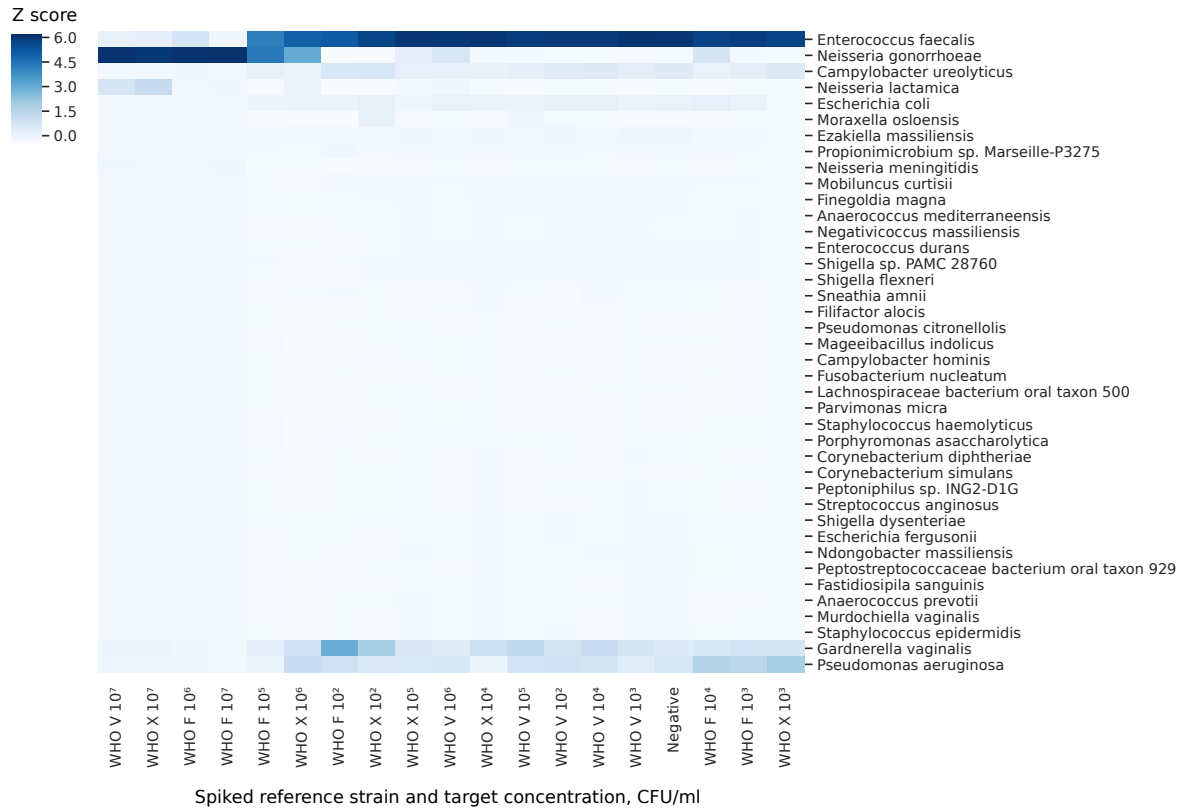

**Figure S4. Common bacterial species sequenced in limit of detection, in-depth spiking experiments.** The x-axis shows the spiked reference strain and concentration in CFU/ml. The z-score is the number of standard deviations above the mean number of bases per taxon for the taxa shown on the y-axis.

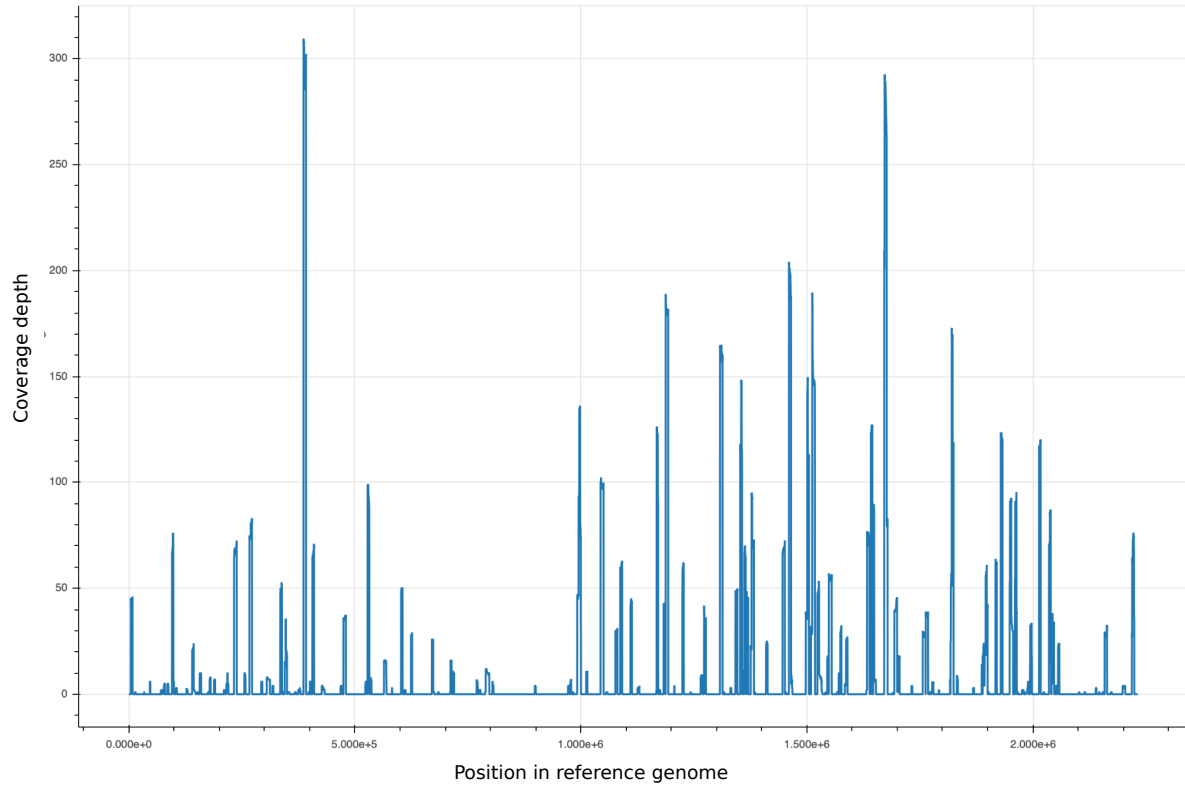

**Figure S5. *N. gonorrhoeae* reference genome coverage observed in a negative control sample.** Reads mapped to less than 24% of the reference genome at a coverage depth of 1-fold, and less than 14% at a coverage depth of  $\geq 10$ -fold.



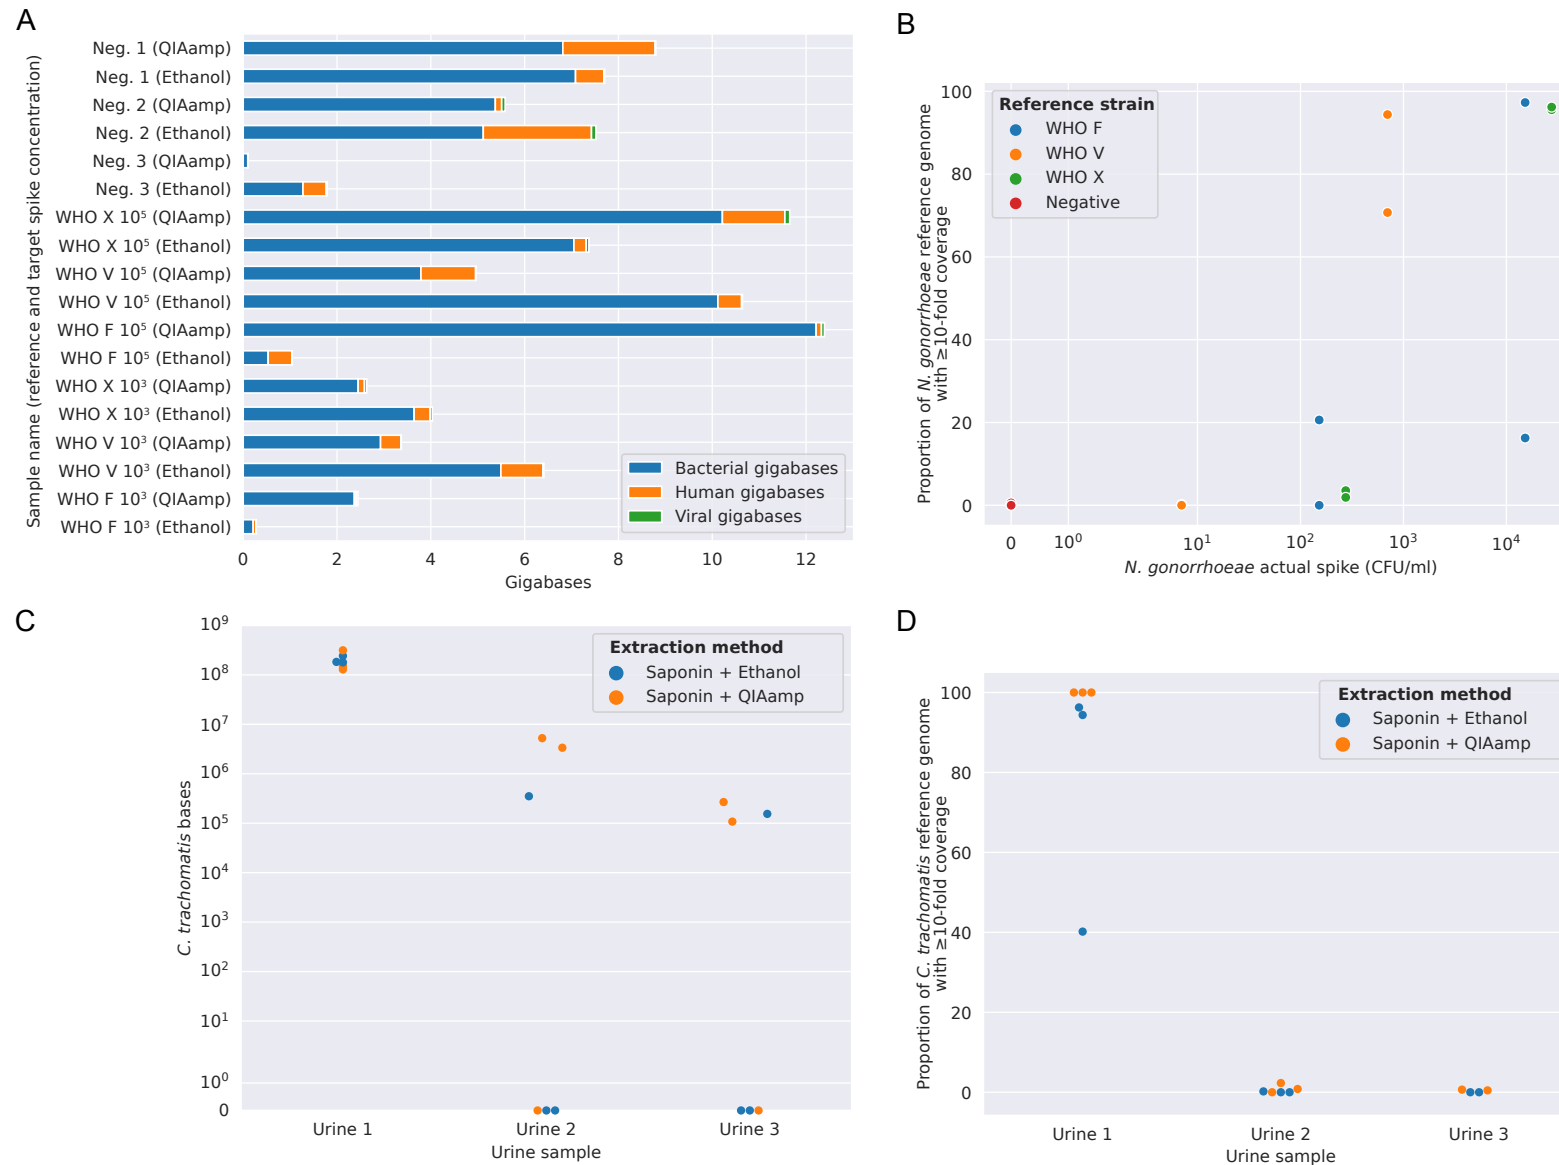

**Figure S6. *N. gonorrhoeae* and *C. trachomatis* detection in spiked Chlamydia NAAT-positive samples.** Chlamydia NAAT-positive urine collected from three patients was used. Target spikes of 10<sup>2</sup> and 10<sup>4</sup> CFU/ml of *N. gonorrhoeae* WHO F were individually spiked into 3 ml of urine from each patient. This was repeated for *N. gonorrhoeae* WHO X and WHO V and an un-spiked sample from each patient was used as a negative control (n=18). Panel A shows the proportion of sequenced reads classified as human, bacterial or viral. Panel B shows the proportion of the NCCP11945 *N. gonorrhoeae*

reference genome covered at  $\geq 10$ -fold depth. Panel C shows the total number of *C. trachomatis* bases sequenced and panel D the proportion of the D/UW-3/CX *C. trachomatis* reference genome covered at  $\geq 10$ -fold depth.

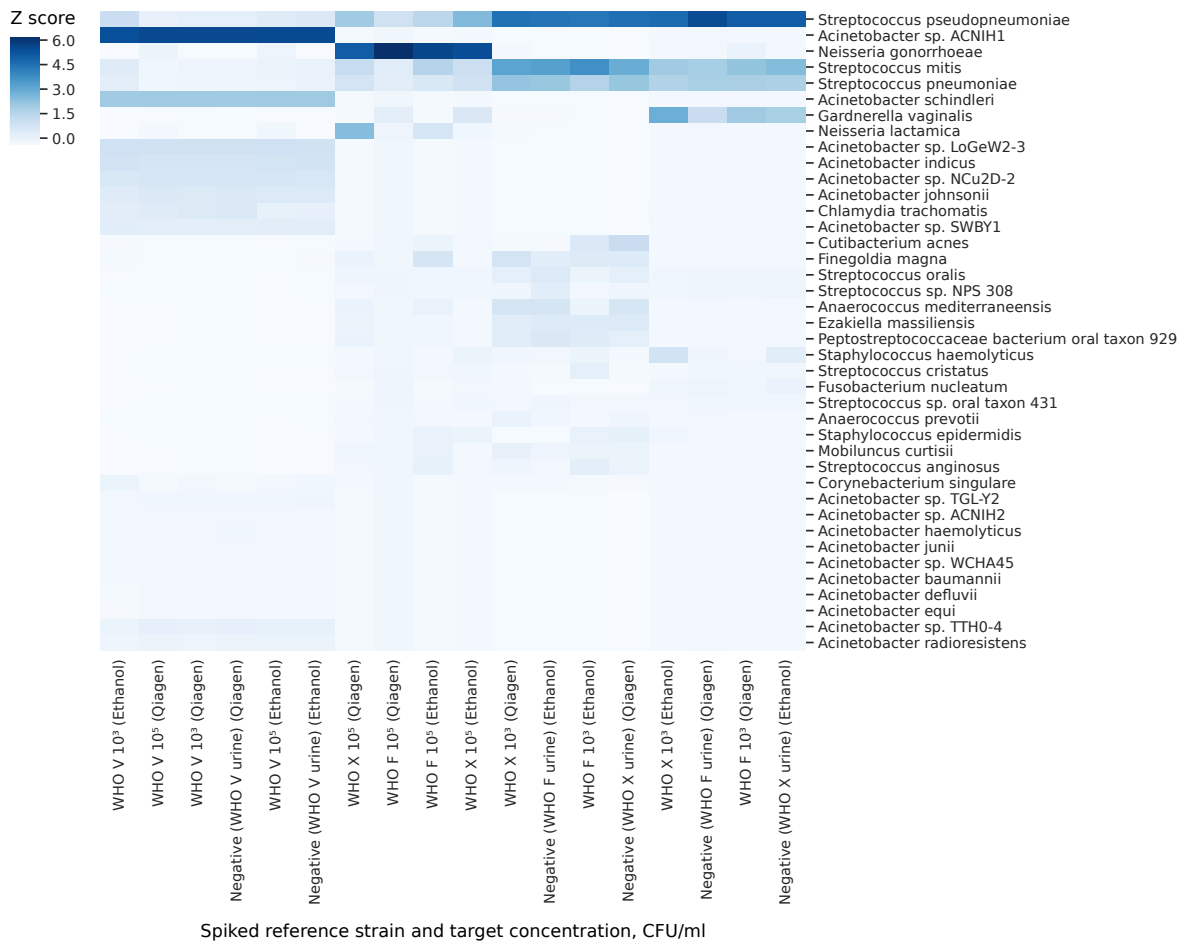

**Figure S7. Detection of additional species in Chlamydia NAAT-positive samples.** Cluster map of the top 40 additional species identified by sequencing in the three spiked Chlamydia-positive urines. The z-score is the number of standard deviations above the mean number of bases per taxon for the taxa shown on the y-axis.
